# Supplementary material for: High Selective Composite Polyalkylmethylsiloxane Membranes for Pervaporative Removal of MTBE from Water: Effect of Polymer Side-chain
Source: MDPI journal article supplement (doi:10.3390/polym12061213), 2020-05-26
Supplement: s1 [file s1]

## Supplementary Materials to Article

**“High selective composite polyalkylmethylsiloxane membranes for pervaporative removal of MTBE from water: Effect of polymer side chain”**

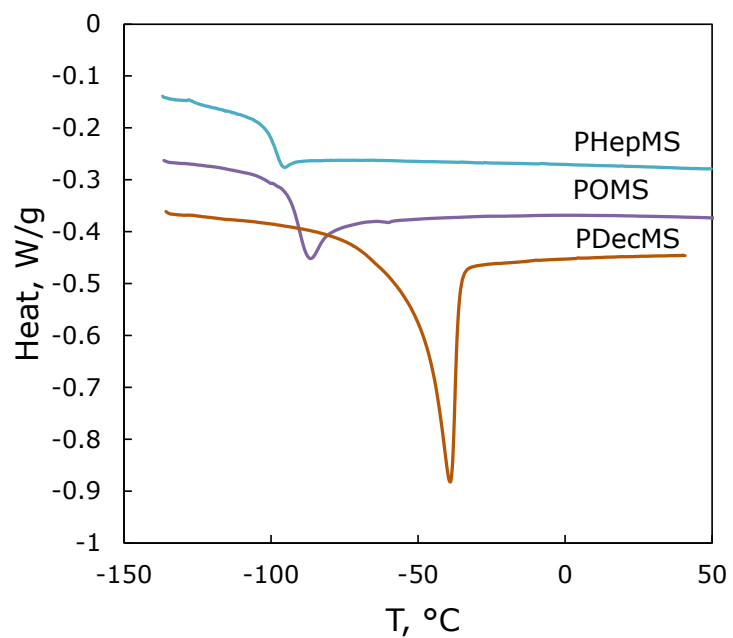

Figure S1: DSC curves of polyalkylmethylsiloxanes.
